# Supplementary material for: Identification and Characterization of MicroRNAs in Gonads of Helicoverpa armigera (Lepidoptera: Noctuidae)
Source: MDPI journal article supplement (doi:10.3390/insects12080749), 2021-08-19
Supplement: s1 [file s1]

**Table S1.** Stem-loop RT-PCR and qPCR primers of miRNAs of *H. armigera*.

| miRNA ID    | qPCR primer(5'-3')                                   | Stem-loop RT primer(5'-3')                             |
|-------------|------------------------------------------------------|--------------------------------------------------------|
| miR-252a-5p | F:CTAAGTACTAGTGCCGCAGGAG<br>R:GTGCAGGGTCCGAGGTATTC   | GTCGTATCCAGTGCAGGGTCCGAGGTA<br>TTCGCACTGGATACGACCTCCTG |
| miR-34      | F:TGGCAGTGTGGTTAGCTGGTT<br>R:GTGCAGGGTCCGAGGTATTC    | GTCGTATCCAGTGCAGGGTCCGAGGTA<br>TTCGCACTGGATACGACAACCAG |
| miR-989a    | F:GTGTGATGTGACGTAGTGGAAG<br>R:GTGCAGGGTCCGAGGTATTC   | GTCGTATCCAGTGCAGGGTCCGAGGTA<br>TTCGCACTGGATACGACCTTCCA |
| miR-1a-5p   | F:TGGAATGTAAAGAAGTATGGAG<br>R:GTGCAGGGTCCGAGGTATTC   | GTCGTATCCAGTGCAGGGTCCGAGGTA<br>TTCGCACTGGATACGACCTCCAT |
| miR-263a-5p | F:AATGGCACTGGAAGAATTCACGGG<br>R:GTGCAGGGTCCGAGGTATTC | GTCGTATCCAGTGCAGGGTCCGAGGTA<br>TTCGCACTGGATACGACCCCGTG |
| miR-31-5p   | F: AGGCAAGAAGTCGGCATAGCTGT<br>R:GTGCAGGGTCCGAGGTATTC | GTCGTATCCAGTGCAGGGTCCGAGGTA<br>TTCGCACTGGATACGACACAGCT |
| miR-2c      | F: TATCACAGCCAGCTTTGTTGACT<br>R:GTGCAGGGTCCGAGGTATTC | GTCGTATCCAGTGCAGGGTCCGAGGTA<br>TTCGCACTGGATACGACAGTCAA |
| miR-2763    | F: ATATTATGCTCATTACTTTGGAT<br>R:GTGCAGGGTCCGAGGTATTC | GTCGTATCCAGTGCAGGGTCCGAGGTA<br>TTCGCACTGGATACGACATCCAA |
| miR-998     | F: TAGCACCATGGGATTCAGCTC<br>R:GTGCAGGGTCCGAGGTATTC   | GTCGTATCCAGTGCAGGGTCCGAGGTA<br>TTCGCACTGGATACGACGAGCTG |
| miR-2765    | F: TGGTAACTCCACCACCGTTGGC<br>R:GTGCAGGGTCCGAGGTATTC  | GTCGTATCCAGTGCAGGGTCCGAGGTA<br>TTCGCACTGGATACGACGCCAAC |
| miR-263b-5p | F: CTTGGCACTGGGAGAATTCAC<br>R:GTGCAGGGTCCGAGGTATTC   | GTCGTATCCAGTGCAGGGTCCGAGGTA<br>TTCGCACTGGATACGACGTGCCT |
| U6          | F: AGGATGACACGCAAAATCGT<br>R:GTGCAGGGTCCGAGGTATTC    | GTCGTATCCAGTGCAGGGTCCGAGGTA<br>TTCGCACTGGATACGACACGATT |
| let-7       | F: GCGGCGGTAGTAGGTTGTAT<br>R:GTGCAGGGTCCGAGGTATTC    | GTCGTATCCAGTGCAGGGTCCGAGGTA<br>TTCGCACTGGATACGACATACAA |
